# Supplementary material
Source: ML conference proceedings conference paper supplement (https://openaccess.thecvf.com/content/CVPR2026/html/Ma_Group_Editing_Edit_CVPR_2026_paper.html)
Supplement: Supplementary file 1 [file Ma_Group_Editing_Edit_CVPR_2026_supplemental.pdf]

# Group Editing : Edit Multiple Images in One Go

## Supplementary Material

### Contents

#### A Rationale

S1

#### B Realted Work

S1

#### C More cases

S1

#### D Demo

S1

### A. Rationale

Having the supplementary compiled together with the main paper means that:

- The supplementary can back-reference sections of the main paper, for example, we can refer to introduction;
- The main paper can forward reference sub-sections within the supplementary explicitly (*e.g.* referring to a particular experiment);
- When submitted to arXiv, the supplementary will already included at the end of the paper.

To split the supplementary pages from the main paper, you can use [Preview \(on macOS\)](#), [Adobe Acrobat](#) (on all OSs), as well as [command line tools](#).

### B. Realted Work

**Generative models for image editing.** Image editing has seen remarkable progress driven by diffusion-based generative models [1–3, 5–7, 10–12, 14, 18, 19, 22–24]. Existing techniques can be broadly divided into inference-time zero-shot methods that edit images by manipulating the diffusion process itself (such as PnP [18], Prompt2Prompt [12], and MasaCtrl [3]), and training-based methods, which achieve editing by fine-tuning latent diffusion models (represented by ControlNet [25] and T2I-Adapter [13]). However, these methods remain tailored to single-image editing. When applied to a group of related images, they often fail to maintain coherence in appearance and structure, resulting in inconsistencies. Existing efforts to enforce consistency, whether by propagation [19] or attention-based correspondences [3, 12], are limited to small inputs and break down under complex geometric variation, in part due to the scarcity of suitable paired training data. In response, we formalize the problem of *Group-Image Editing* and introduce *GroupEditing*: a trainable framework that views related images as pseudo video frames to inherit implicit consistency priors from video models, while additionally incorporating

an explicit correspondence module to ensure reliable alignment.

**Video prior for editing task.** Video generative models [4, 16, 17, 26, 27] provide powerful temporal consistency priors that can be effectively leveraged for image editing. Existing studies generally follow two directions: utilizing video data for training data curation and leveraging video models for inference-time guidance. For the former, Bagel [9], UniReal [8], and OmniGen [21] sample temporally coherent frames from video data to create high-quality training sequences, a strategy that implicitly injects structural and appearance continuity into the resulting image models. For the latter, Frame2Frame [15] utilizes a pre-trained video diffusion model to synthesize a sequence of frames and select an intermediate frame, thereby enforcing temporal smoothness and structural continuity directly during inference. ChronoEdit [20] leverages pretrained video generative models to reframe image editing as a video generation task, using the input and target images as video endpoints. While effective for enhancing single-image quality or ensuring short-range consistency, these approaches do not solve the fundamental challenge of Group-Image Editing across diverse, static views. Our approach differs by re-framing the image group as a pseudo video sequence, allowing us to explicitly inherit the powerful spatio-temporal coherence and geometric priors of large-scale video models for robustly unified editing.

### C. More cases

### D. Demo

We provide the [demo video](#) and [project page](#) in the file, please watch it for better illustration.

### References

- [1] Tim Brooks, Aleksander Holynski, and Alexei A Efros. Instructpix2pix: Learning to follow image editing instructions. In *Proceedings of the IEEE/CVF conference on computer vision and pattern recognition*, pages 18392–18402, 2023. S1
- [2] Kaitong Cai, Jusheng Zhang, Yijia Fan, Jing Yang, and Keze Wang. Racot: Plug-and-play contrastive example generation mechanism for enhanced llm reasoning reliability, 2025.
- [3] Mingdeng Cao, Xintao Wang, Zhongang Qi, Ying Shan, Xi-aohu Qie, and Yinqiang Zheng. Masactrl: Tuning-free mutual self-attention control for consistent image synthesis and editing. In *Proceedings of the IEEE/CVF international conference on computer vision*, pages 22560–22570, 2023. S1

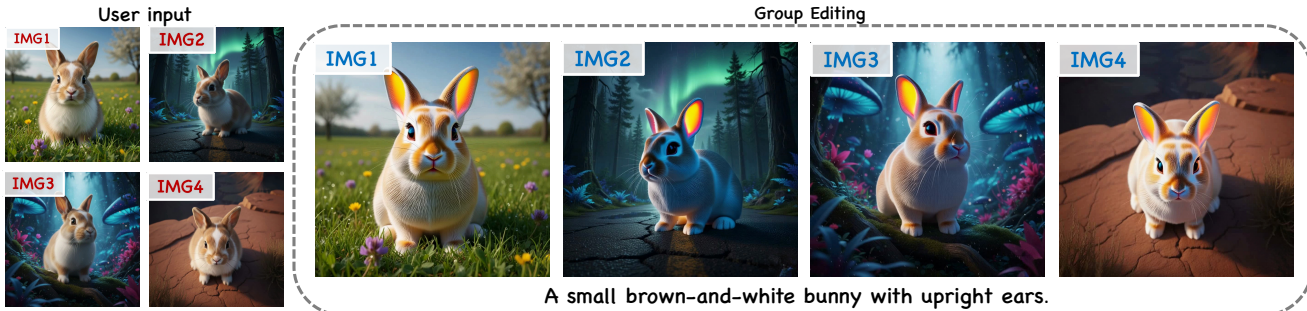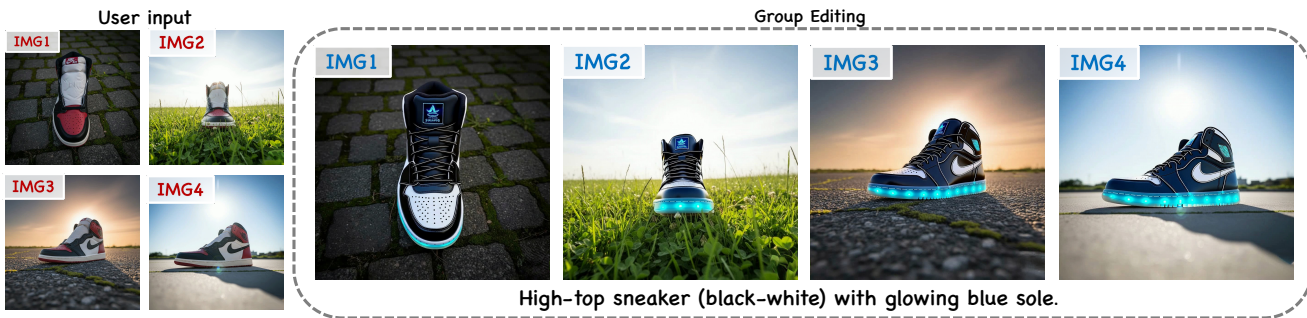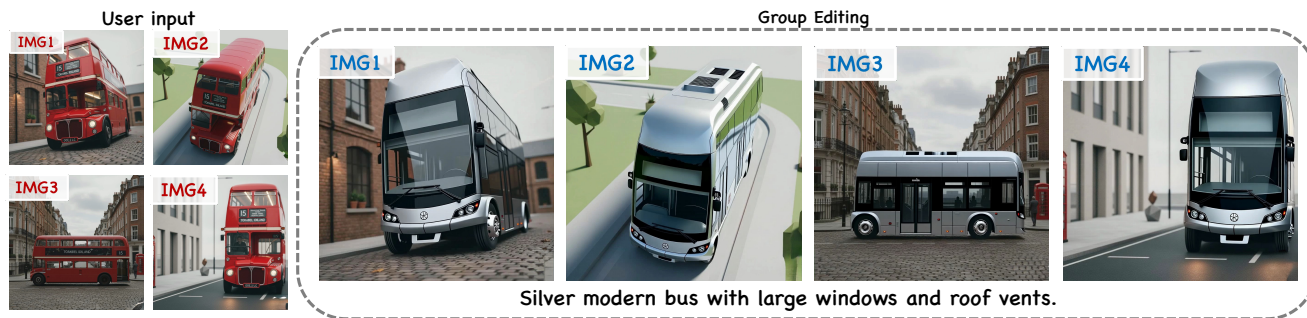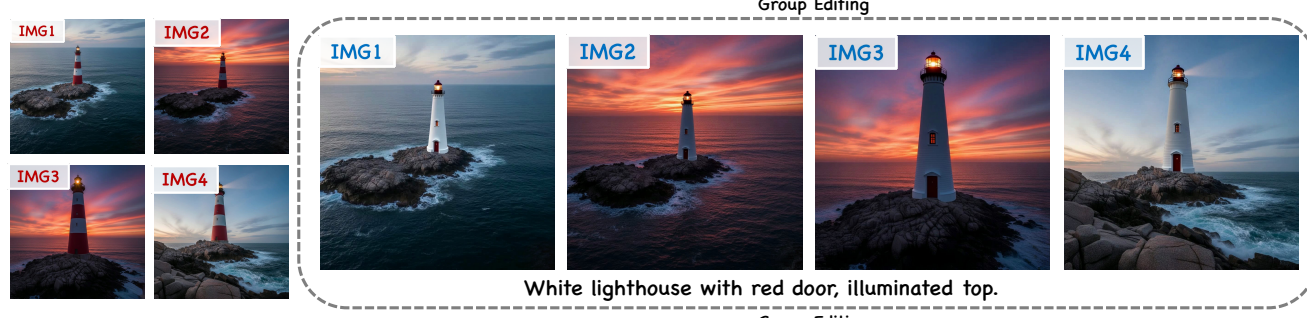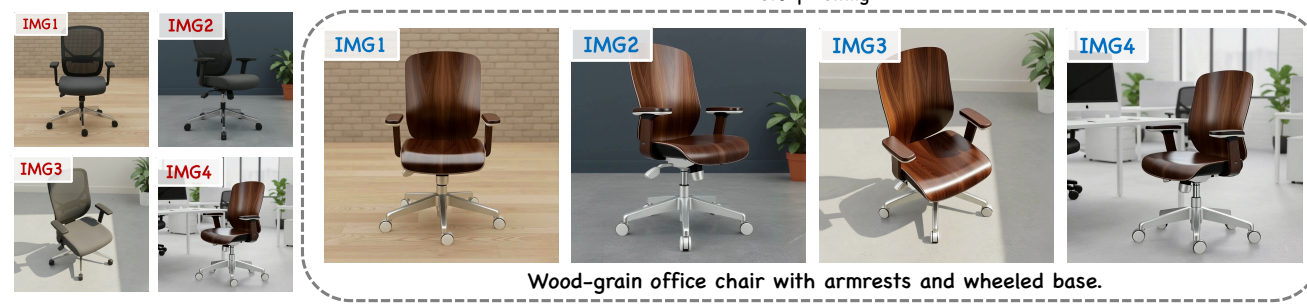

Figure 1. More cases.

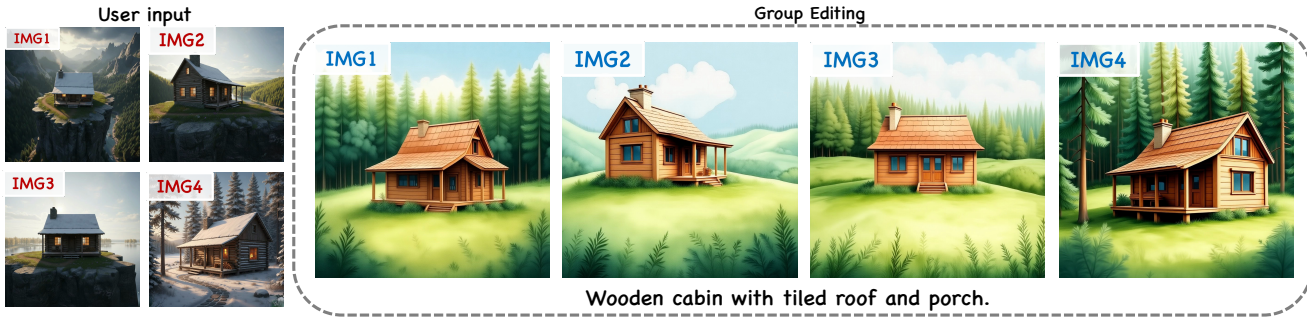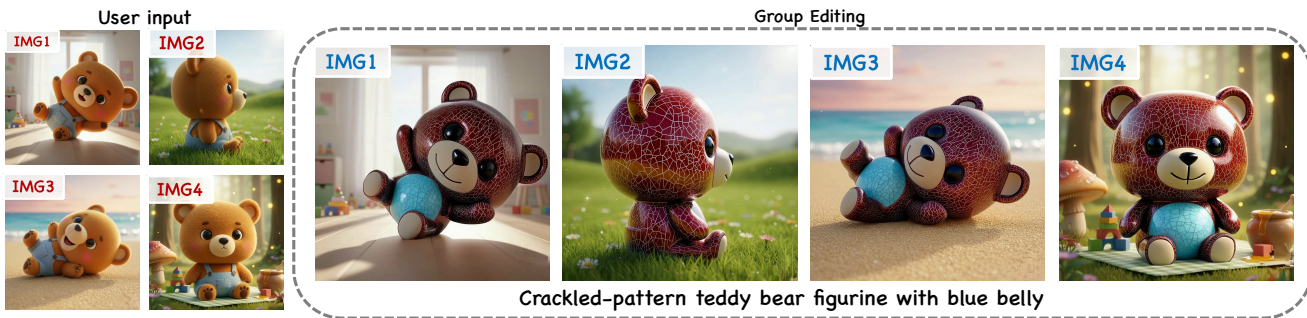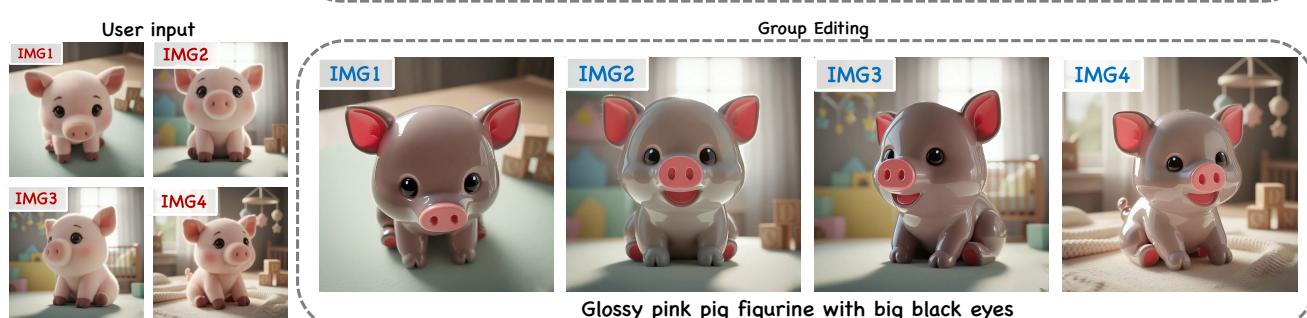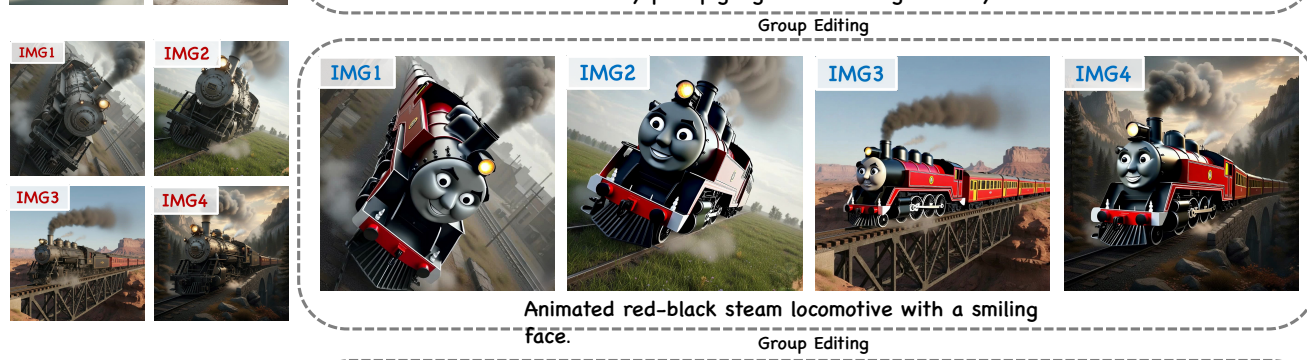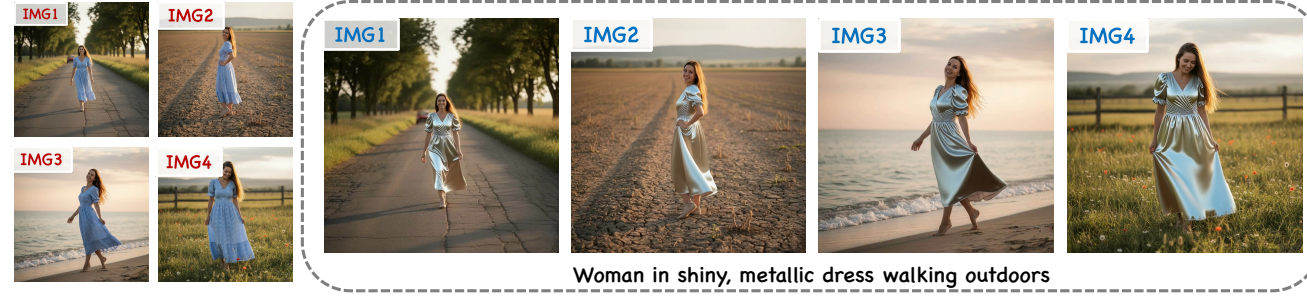

Figure 2. More cases.

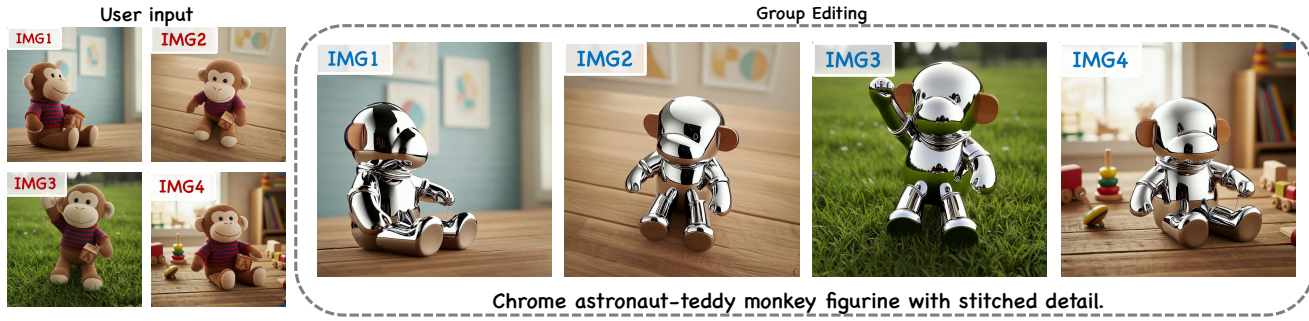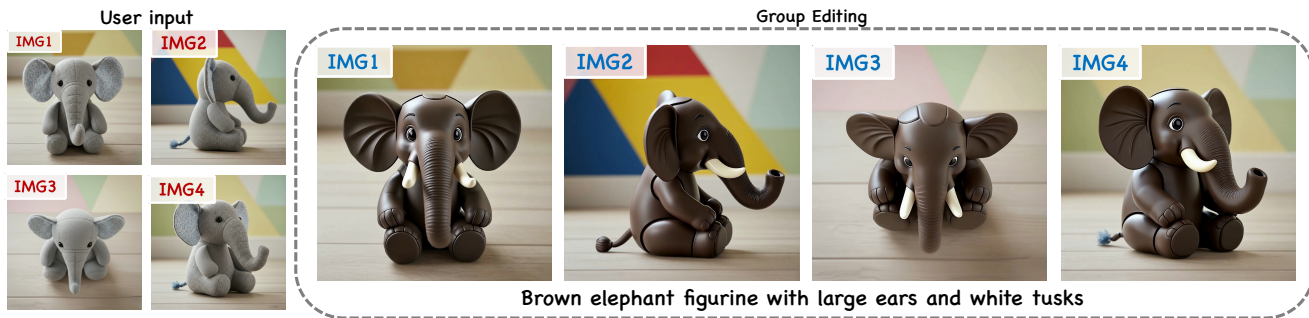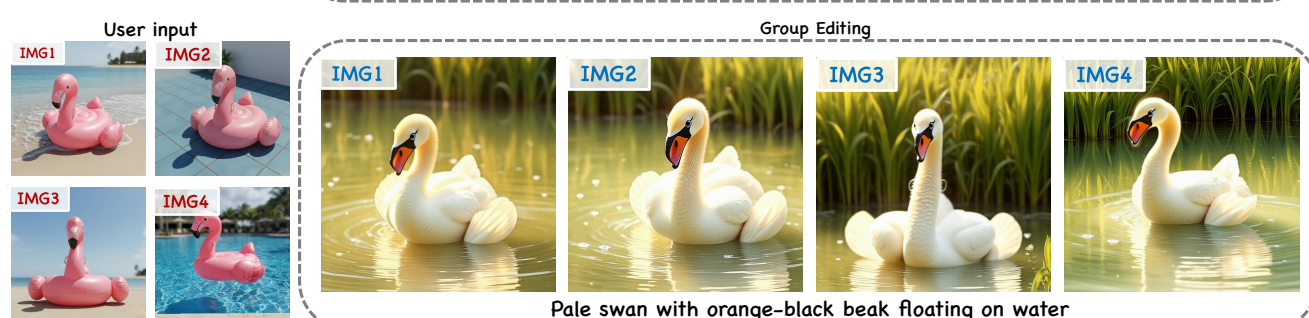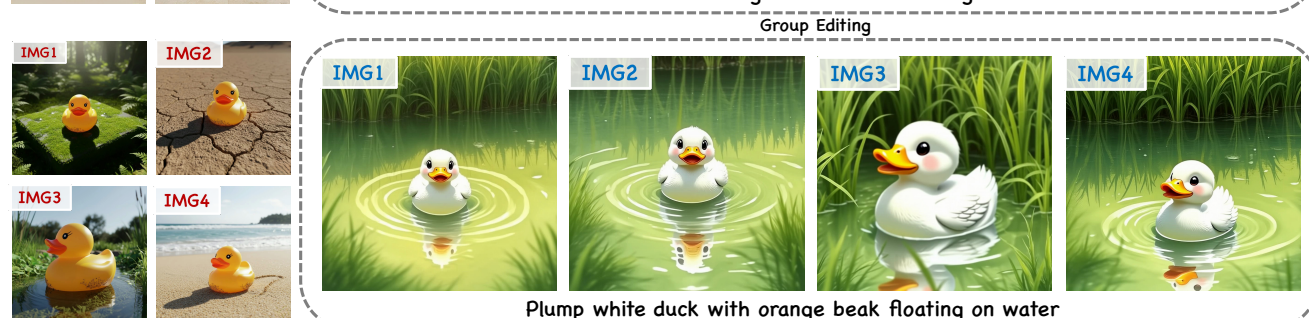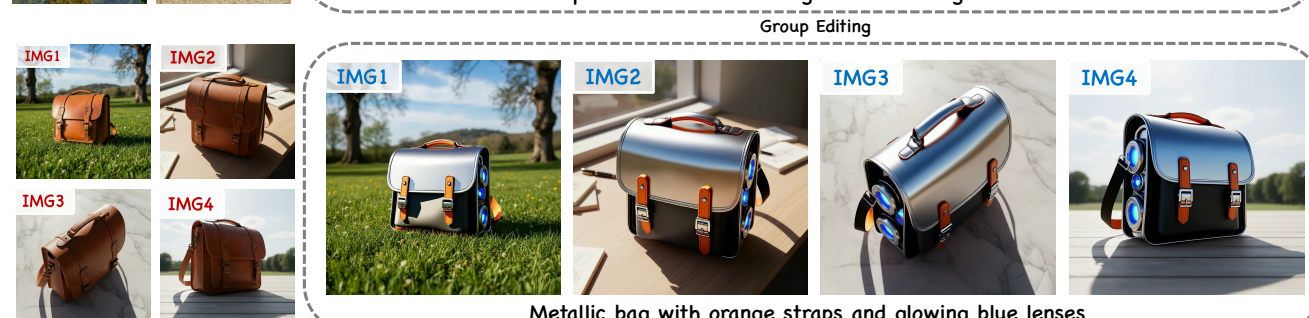

Figure 3. More cases.

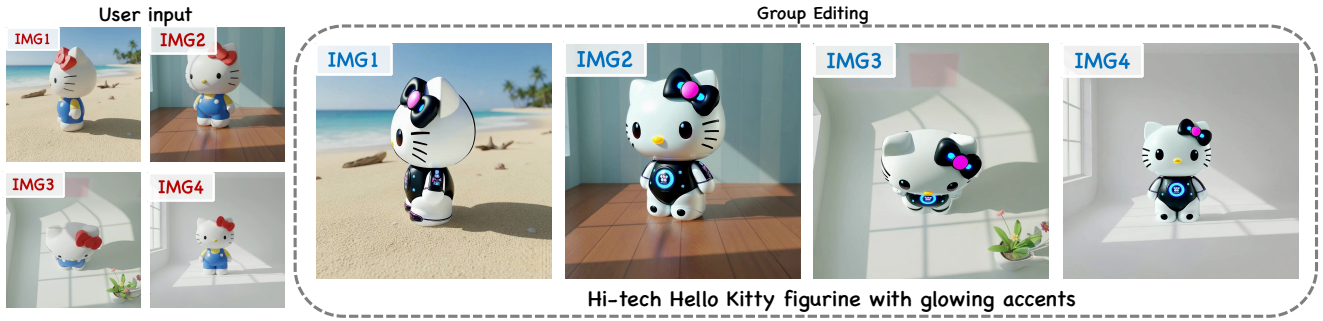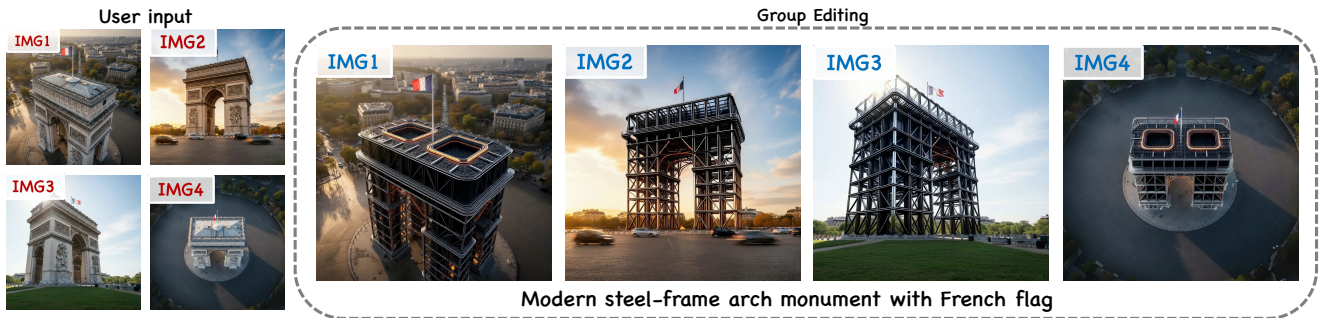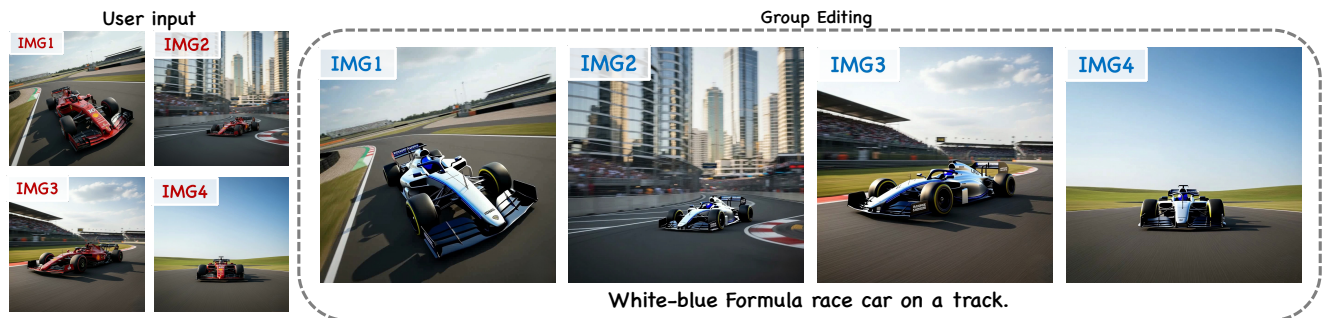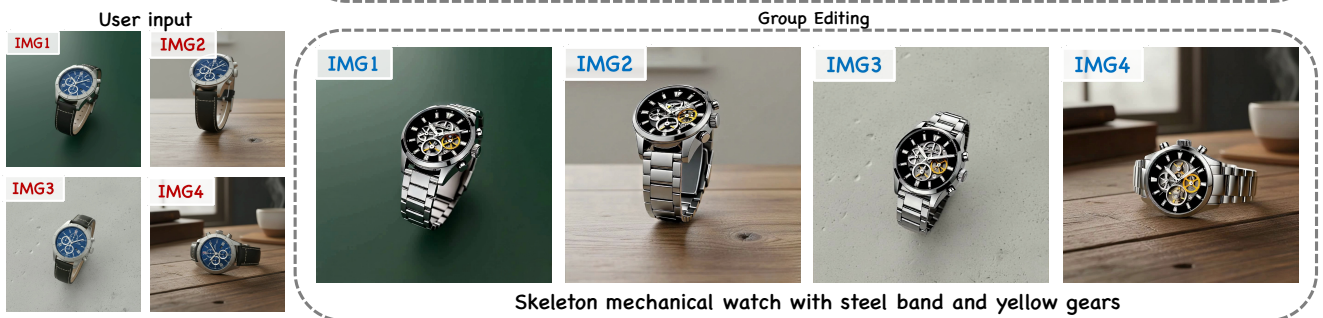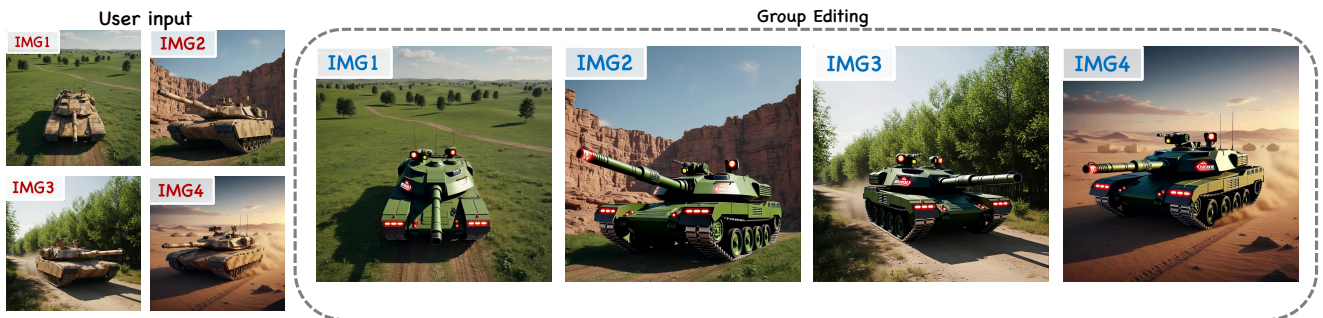

Figure 4. More cases.

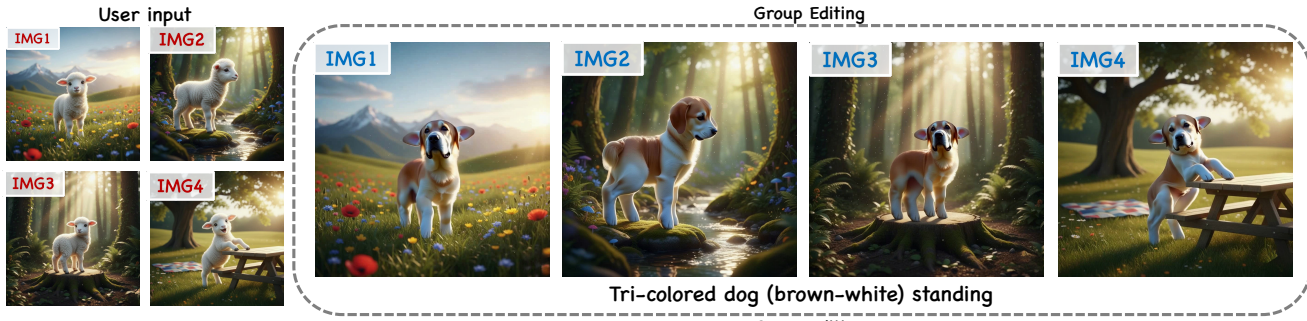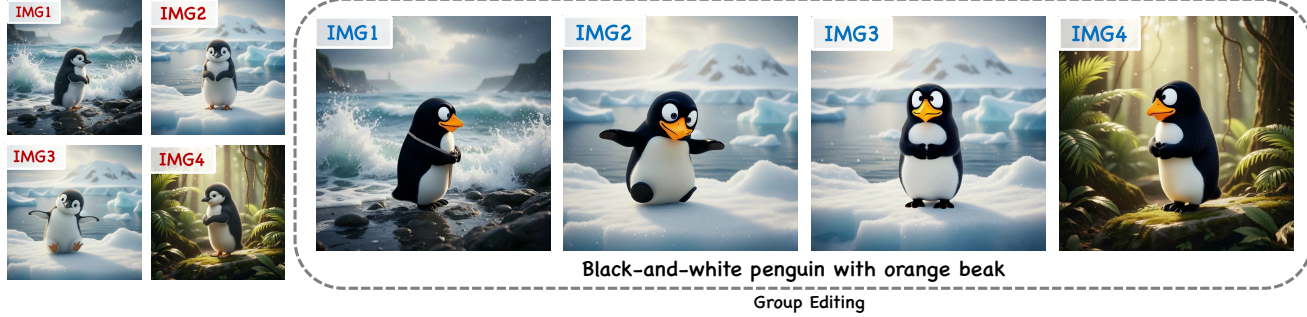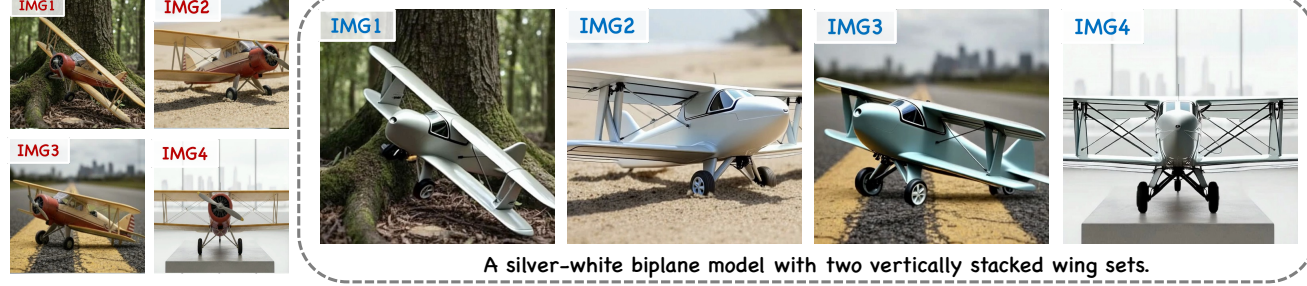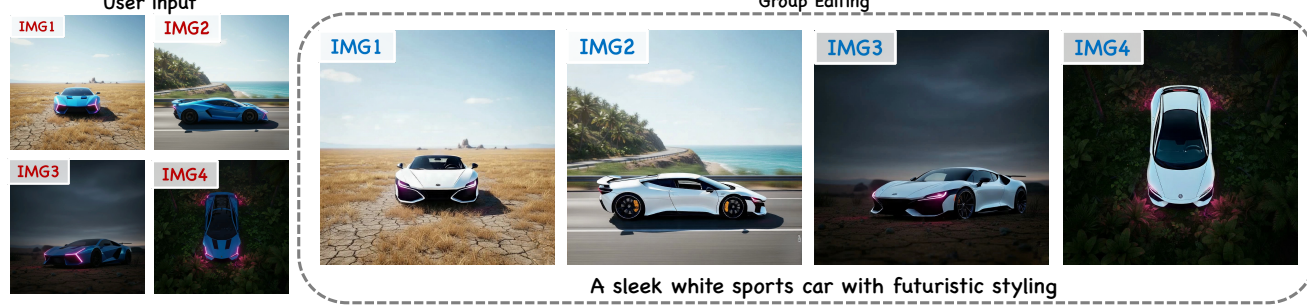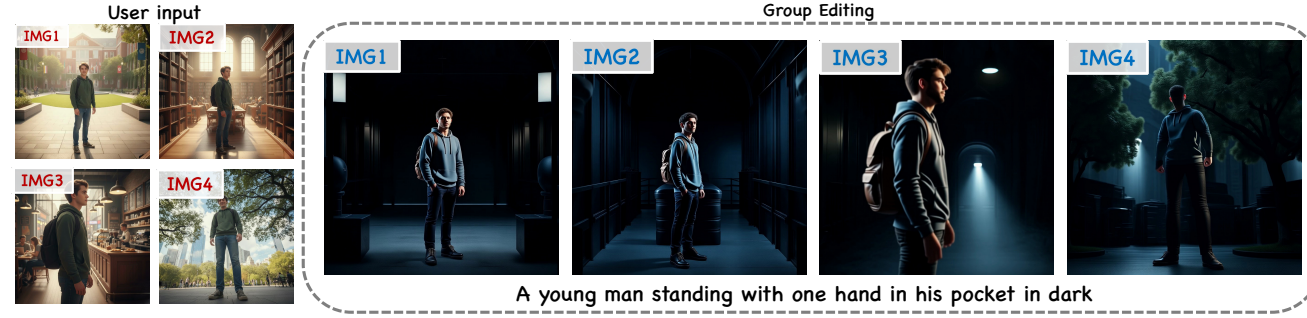

Figure 5. More cases.

- [4] Chubin Chen, Sujie Hu, Jiashu Zhu, Meiqi Wu, Jintao Chen, Yanxun Li, Nisha Huang, Chengyu Fang, Jiahong Wu, Xi-angxiang Chu, et al. Taming preference mode collapse via directional decoupling alignment in diffusion reinforcement learning. *arXiv preprint arXiv:2512.24146*, 2025. [S1](#)
- [5] Chubin Chen, Jiashu Zhu, Xiaokun Feng, et al. S<sup>2</sup>-guidance: Stochastic self guidance for training-free enhancement of diffusion models. *arXiv preprint arXiv:2508.12880*, 2025. [S1](#)
- [6] Xi Chen, Yutong Feng, Mengting Chen, Yiyang Wang, Shilong Zhang, Yu Liu, Yujun Shen, and Hengshuang Zhao. Zero-shot image editing with reference imitation. *Advances in Neural Information Processing Systems*, 37:84010–84032, 2024.
- [7] Xi Chen, Lianghua Huang, Yu Liu, Yujun Shen, Deli Zhao, and Hengshuang Zhao. Anydoor: Zero-shot object-level image customization. In *Proceedings of the IEEE/CVF conference on computer vision and pattern recognition*, pages 6593–6602, 2024. [S1](#)
- [8] Xi Chen, Zhifei Zhang, He Zhang, Yuqian Zhou, Soo Ye Kim, Qing Liu, Yijun Li, Jianming Zhang, Nanxuan Zhao, Yilin Wang, et al. Unireal: Universal image generation and editing via learning real-world dynamics. In *Proceedings of the Computer Vision and Pattern Recognition Conference*, pages 12501–12511, 2025. [S1](#)
- [9] Chaorui Deng, Deyao Zhu, Kunchang Li, Chenhui Gou, Feng Li, Zeyu Wang, Shu Zhong, Weihao Yu, Xiaonan Nie, Ziang Song, et al. Emerging properties in unified multimodal pretraining. *arXiv preprint arXiv:2505.14683*, 2025. [S1](#)
- [10] Yijia Fan, Jusheng Zhang, Kaitong Cai, Jing Yang, Chengpei Tang, Jian Wang, and Keze Wang. Cost-effective communication: An auction-based method for language agent interaction, 2025. [S1](#)
- [11] Jonathan Ho, Ajay Jain, and Pieter Abbeel. Denoising diffusion probabilistic models. *Advances in neural information processing systems*, 33:6840–6851, 2020.
- [12] Ron Mokady, Amir Hertz, Kfir Aberman, Yael Pritch, and Daniel Cohen-Or. Null-text inversion for editing real images using guided diffusion models. In *Proceedings of the IEEE/CVF conference on computer vision and pattern recognition*, pages 6038–6047, 2023. [S1](#)
- [13] Chong Mou, Xintao Wang, Liangbin Xie, Yanze Wu, Jian Zhang, Zhongang Qi, and Ying Shan. T2i-adapter: Learning adapters to dig out more controllable ability for text-to-image diffusion models. In *Proceedings of the AAAI conference on artificial intelligence*, pages 4296–4304, 2024. [S1](#)
- [14] Robin Rombach, Andreas Blattmann, Dominik Lorenz, Patrick Esser, and Björn Ommer. High-resolution image synthesis with latent diffusion models. In *Proceedings of the IEEE/CVF conference on computer vision and pattern recognition*, pages 10684–10695, 2022. [S1](#)
- [15] Noam Rotstein, Gal Yona, Daniel Silver, Roy Velich, David Bensaid, and Ron Kimmel. Pathways on the image manifold: Image editing via video generation. In *Proceedings of the Computer Vision and Pattern Recognition Conference*, pages 7857–7866, 2025. [S1](#)
- [16] Yiren Song, Danze Chen, and Mike Zheng Shou. Layer-tracer: Cognitive-aligned layered svg synthesis via diffusion transformer. *arXiv preprint arXiv:2502.01105*, 2025. [S1](#)
- [17] Yiren Song, Cheng Liu, and Mike Zheng Shou. Makeanything: Harnessing diffusion transformers for multi-domain procedural sequence generation. *arXiv preprint arXiv:2502.01572*, 2025. [S1](#)
- [18] Narek Tumanyan, Michal Geyer, Shai Bagon, and Tali Dekel. Plug-and-play diffusion features for text-driven image-to-image translation. In *Proceedings of the IEEE/CVF conference on computer vision and pattern recognition*, pages 1921–1930, 2023. [S1](#)
- [19] Daniel Winter, Matan Cohen, Shlomi Fruchter, Yael Pritch, Alex Rav-Acha, and Yedid Hoshen. Objectdrop: Bootstrapping counterfactuals for photorealistic object removal and insertion. In *European Conference on Computer Vision*, pages 112–129. Springer, 2024. [S1](#)
- [20] Jay Zhangjie Wu, Xuanchi Ren, Tianchang Shen, Tianshi Cao, Kai He, Yifan Lu, Ruiyuan Gao, Enze Xie, Shiyi Lan, Jose M Alvarez, et al. Chronoedit: Towards temporal reasoning for image editing and world simulation. *arXiv preprint arXiv:2510.04290*, 2025. [S1](#)
- [21] Shitao Xiao, Yueze Wang, Junjie Zhou, Huaying Yuan, Xingrun Xing, Ruiran Yan, Chaofan Li, Shuting Wang, Tiejun Huang, and Zheng Liu. Omnigen: Unified image generation. In *Proceedings of the Computer Vision and Pattern Recognition Conference*, pages 13294–13304, 2025. [S1](#)
- [22] Jusheng Zhang, Kaitong Cai, Yijia Fan, Jian Wang, and Keze Wang. Cf-*vlm*: counterfactual vision-language fine-tuning, 2025. [S1](#)
- [23] Jusheng Zhang, Yijia Fan, Wenjun Lin, Ruiqi Chen, Haoyi Jiang, Wenhao Chai, Jian Wang, and Keze Wang. GAM-agent: Game-theoretic and uncertainty-aware collaboration for complex visual reasoning. In *The Thirty-ninth Annual Conference on Neural Information Processing Systems*, 2025.
- [24] Jusheng Zhang, Zimeng Huang, Yijia Fan, Ningyuan Liu, Mingyan Li, Zhuojie Yang, Jiawei Yao, Jian Wang, and Keze Wang. KABB: Knowledge-aware bayesian bandits for dynamic expert coordination in multi-agent systems. In *Forty-second International Conference on Machine Learning*, 2025. [S1](#)
- [25] Lvmin Zhang, Anyi Rao, and Maneesh Agrawala. Adding conditional control to text-to-image diffusion models. In *Proceedings of the IEEE/CVF international conference on computer vision*, pages 3836–3847, 2023. [S1](#)
- [26] Yuxuan Zhang, Yiren Song, Jiaming Liu, Rui Wang, Jinpeng Yu, Hao Tang, Huaxia Li, Xu Tang, Yao Hu, Han Pan, et al. Ssr-encoder: Encoding selective subject representation for subject-driven generation. In *Proceedings of the IEEE/CVF Conference on Computer Vision and Pattern Recognition*, pages 8069–8078, 2024. [S1](#)
- [27] Yuxuan Zhang, Yirui Yuan, Yiren Song, Haofan Wang, and Jiaming Liu. Easycontrol: Adding efficient and flexible control for diffusion transformer. *arXiv preprint arXiv:2503.07027*, 2025. [S1](#)
